# Supplementary material
Source: publisher figshare collection journal article supplement (https://acs.figshare.com/ndownloader/files/4583077)
Supplement: Supplementary file 1 [file 4583077]

# Air Emissions Due to Wind and Solar Power

***Warren Katzenstein and Jay Apt***

## **Supporting Information**

|                                                |     |
|------------------------------------------------|-----|
| 1. Regression Analyses .....                   | S2  |
| 2. Regressions Constraints .....               | S14 |
| 3. Profile Sensitivity Analysis Raw Data ..... | S15 |
| 4. Multiple Turbine Analysis .....             | S19 |
| 5. References .....                            | S20 |

## 1. Regression Analyses

### *Data*

Each emissions data set contains six variables: date, time, power generated, heat rate, NO<sub>x</sub> mass emission, and a calibration flag. We model only NO<sub>x</sub> and CO<sub>2</sub> emissions from the turbine. Carbon monoxide is emitted and is regulated for natural gas turbines but we do not consider CO in the present analysis.

### *CO<sub>2</sub> Approach*

The LM6000 data (fig. S1 and S2) were divided into four regions corresponding to startup, ramping up to full power, full power, and ramping down to shutdown phases (identified as regions 1, 2, 3, and 4, respectively in fig. S3).

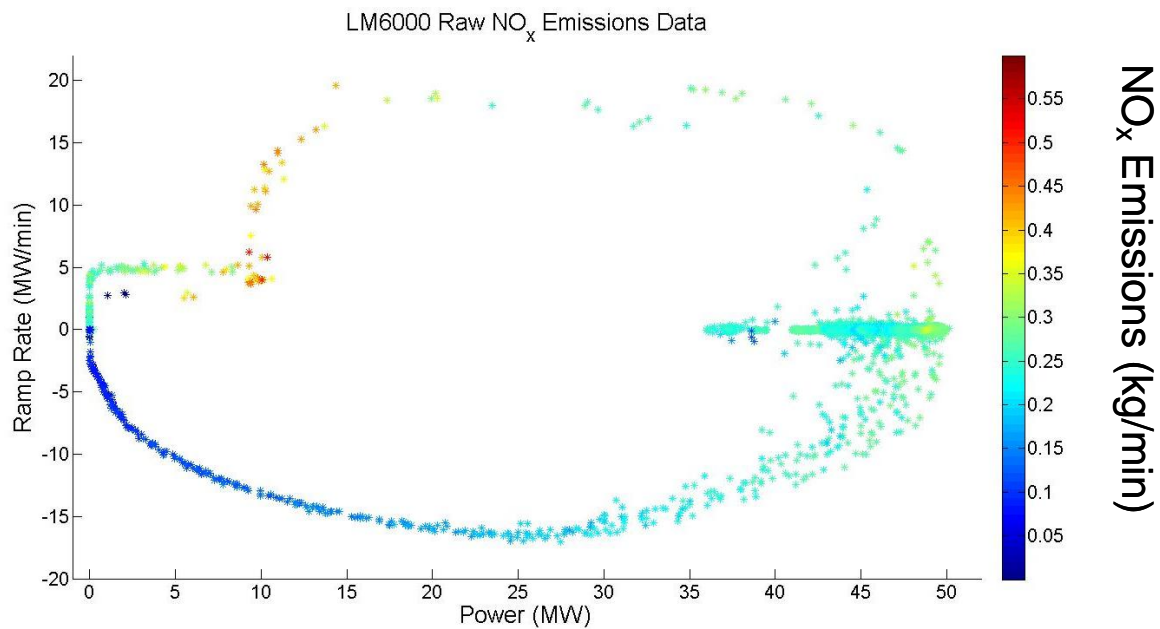

Figure S1 - LM6000 raw NO<sub>x</sub> emissions data.

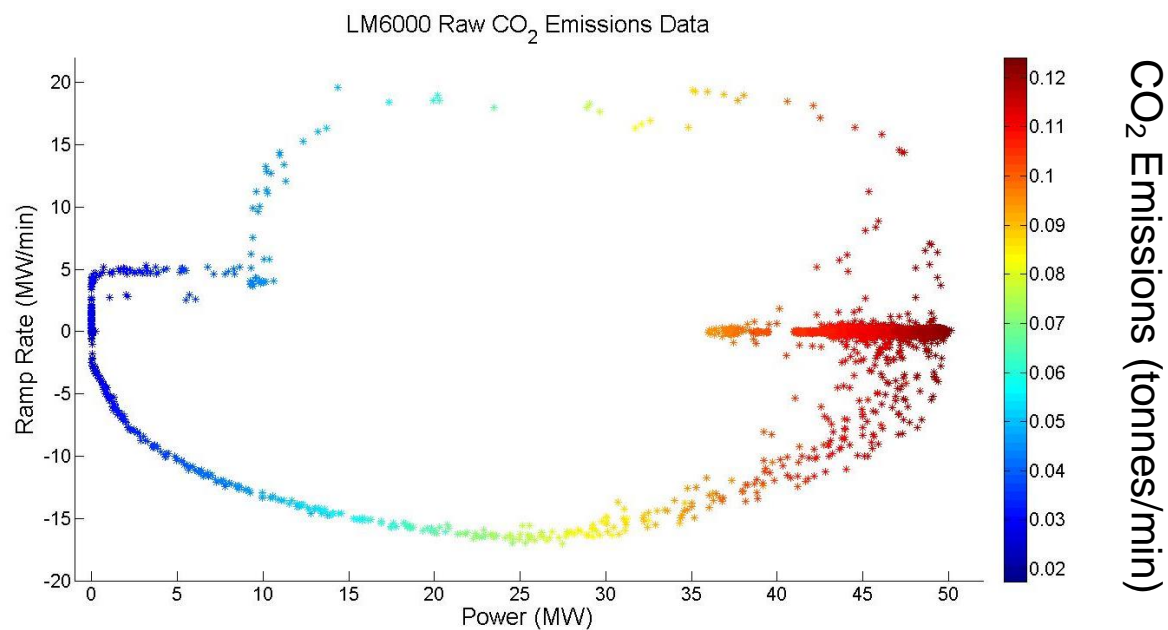

Figure S2 - LM6000 raw CO<sub>2</sub> emissions data.

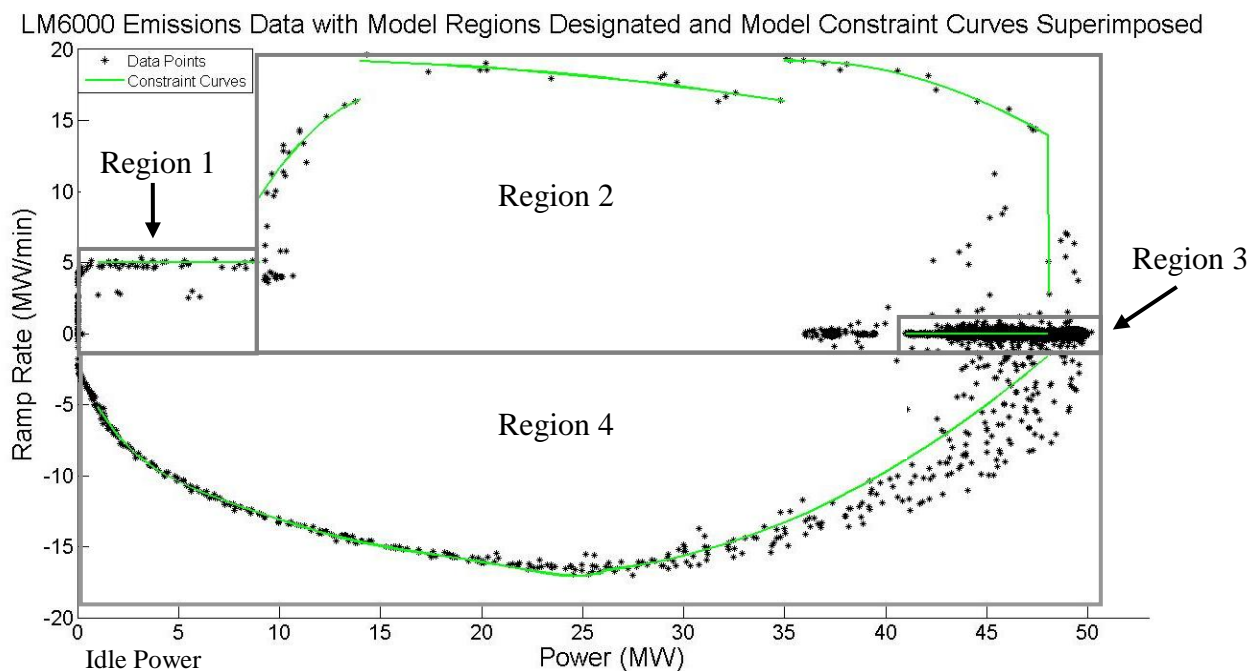

Figure S3 - LM6000 emissions data. The emissions data were divided into four regions which were modeled independently. The constraint curves imposed by the populated data are shown for each region.

We performed a multiple regression on each region (equations S1 – S4); the goodness of fit is shown in figures S4 and S5, by graphing the absolute percent error between a regression model and the corresponding NO<sub>x</sub> emissions data. The 501FD CO<sub>2</sub> data were not divided into multiple regions, as they depend on only the turbine's power level; a linear regression analysis was performed (equation S5 and Figure S6). Adjusted R<sup>2</sup> values are in Table S1 and detailed statistical information on the regression analyses can be found in Tables S2 and S3.

*LM6000 CO<sub>2</sub> Regression Results (in tonnes / min)*

$$\textbf{Region 1} \quad \frac{dM_{CO_2, LM6000}}{dt} = 2.68 \times 10^{-2} + 1.77 \times 10^{-3} P_{LM6000} \quad (\text{S1})$$

$$\textbf{Region 2} \quad \frac{dM_{CO_2, LM6000}}{dt} = 3.18 \times 10^{-2} - 1.54 \times 10^{-3} P_{LM6000} + 5.82 \times 10^{-6} P_{LM6000}^2 - 2.54 \times 10^{-4} \dot{P}_{LM6000} \quad (\text{S2})$$

$$\textbf{Region 3} \quad \frac{dM_{CO_2, LM6000}}{dt} = 3.6 \times 10^{-1} + 1.26 \times 10^{-3} P_{LM6000} + 9.27 \times 10^{-6} P_{LM6000}^2 \quad (\text{S3})$$

$$\textbf{Region 4} \quad \frac{dM_{CO_2, LM6000}}{dt} = 2.72 \times 10^{-2} + 1.88 \times 10^{-3} P_{LM6000} - 9.207 \times 10^{-6} \dot{P}_{LM6000} \quad (\text{S4})$$

*501FD CO<sub>2</sub> Regression Results (in tonnes / min)*

$$\textbf{Region 1} \quad \frac{dM_{CO_2, 501FD}}{dt} = 1.18 \times 10^{-1} + 1.84 \times 10^{-3} P_{LM6000} \quad (\text{S5})$$

TABLE S1 – Adjusted R<sup>2</sup> values for the regressions used to model each region of each turbine and pollutant.

| Adjusted R <sup>2</sup> Values |      |      |      |      |
|--------------------------------|------|------|------|------|
| Region                         | 1    | 2    | 3    | 4    |
| <b>LM6000</b>                  |      |      |      |      |
| CO <sub>2</sub>                | 0.85 | 0.99 | 0.86 | 0.99 |
| NO <sub>x</sub>                | 0.85 | 0.84 | -    | 0.94 |
| <b>501FD</b>                   |      |      |      |      |
| CO <sub>2</sub>                | 0.99 | -    | -    | -    |
| NO <sub>x</sub>                | 0.72 | 0.64 | 0.28 | -    |

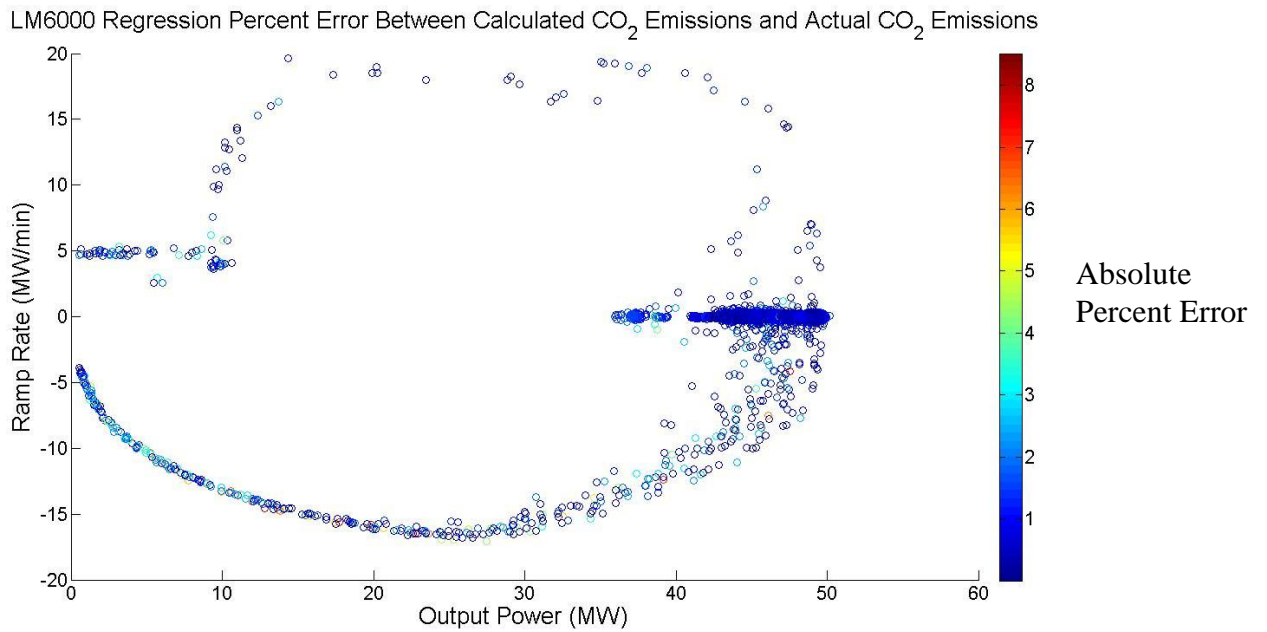

**Figure S4 – Absolute percent error between calculated CO<sub>2</sub> emissions based on regressions and actual CO<sub>2</sub> emissions from LM6000 data set.**

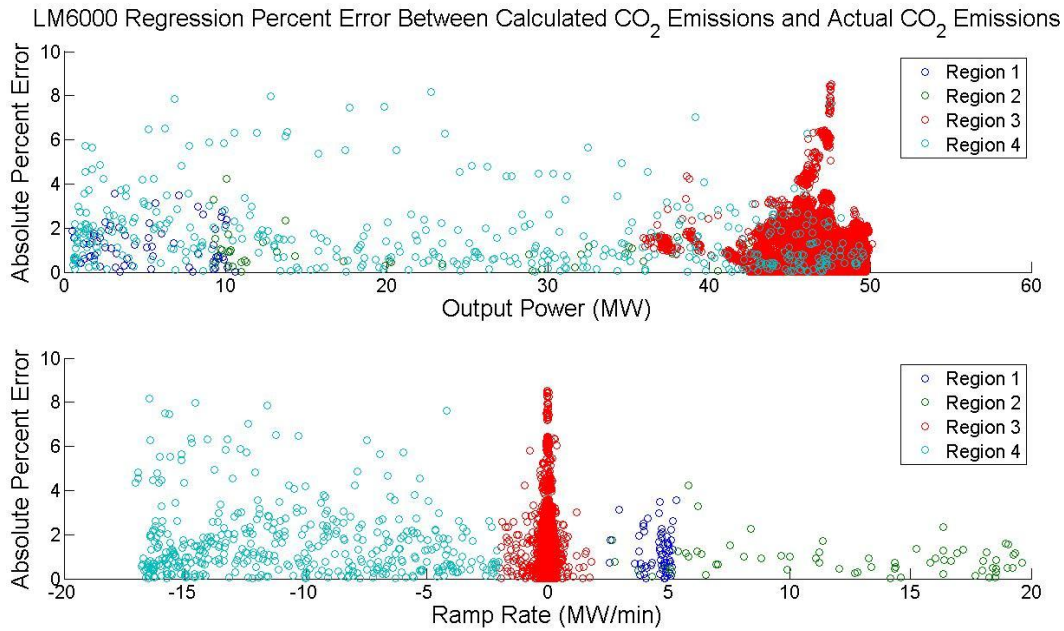

**Figure S5 – Absolute percent error between calculated CO<sub>2</sub> emissions based on regressions and actual CO<sub>2</sub> emissions from LM6000 data set. Results are colored according to the regions (fig. S3). Top: absolute percent error for each data point versus power level. Bottom: absolute percent error for each data point versus ramp rate.**

Table S2 - LM6000 Region CO<sub>2</sub> Regression Results**Region 1**

Equation 
$$\frac{dM_{CO_2, LM 6000}}{dt} = 2.68 \times 10^{-2} + 1.77 \times 10^{-3} P_{LM 6000} \quad [tonnes / min]$$

## Regression Statistics

|                         |                       |
|-------------------------|-----------------------|
| Adjusted R <sup>2</sup> | 0.85                  |
| # of Data Points        | 134                   |
| F-value                 | 731.81                |
| Prob>F                  | <0.0001               |
| Root MSE                | 2.63x10 <sup>-3</sup> |

## Parameter Statistics

|               |            |                       |           |         |
|---------------|------------|-----------------------|-----------|---------|
| Intercept     | Std. Error | 2.84x10 <sup>-4</sup> |           |         |
|               | t-value    | 4.34                  | Prob >  t | <0.0001 |
| $P_{LM 6000}$ | Std. Error | 6.54x10 <sup>-5</sup> |           |         |
|               | t-value    | 27.05                 | Prob >  t | <0.0001 |

**Region 2**

Equation 
$$\frac{dM_{CO_2, LM 6000}}{dt} = 3.18 \times 10^{-2} - 1.54 \times 10^{-3} P_{LM 6000} + 5.82 \times 10^{-6} P_{LM 6000}^2 - 2.54 \times 10^{-4} \dot{P}_{LM 6000} \quad [tonnes / min]$$

## Regression Statistics

|                         |                       |
|-------------------------|-----------------------|
| Adjusted R <sup>2</sup> | 0.999                 |
| # of Data Points        | 65                    |
| F-value                 | 21,893.8              |
| Prob>F                  | <0.0001               |
| Root MSE                | 9.22x10 <sup>-4</sup> |

## Parameter Statistics

|                 |            |                       |           |         |
|-----------------|------------|-----------------------|-----------|---------|
| Intercept       | Std. Error | 5.53x10 <sup>-4</sup> |           |         |
|                 | t-value    | 57.54                 | Prob >  t | <0.0001 |
| $P_{LM 6000}$   | Std. Error | 7.29x10 <sup>-5</sup> |           |         |
|                 | t-value    | 21.15                 | Prob >  t | <0.0001 |
| $P_{LM 6000}^2$ | Std. Error | 1.3x10 <sup>-6</sup>  |           |         |
|                 | t-value    | 4.48                  | Prob >  t | <0.0001 |
| $R_{LM 6000}$   | Std. Error | 3.44x10 <sup>-5</sup> |           |         |
|                 | t-value    | -7.38                 | Prob >  t | <0.0001 |

**Region 3**

Equation 
$$\frac{dM_{CO_2, LM 6000}}{dt} = 3.6 \times 10^{-1} + 1.26 \times 10^{-3} P_{LM 6000} + 9.27 \times 10^{-6} P_{LM 6000}^2 \quad [tonnes / min]$$

## Regression Statistics

|                         |                       |
|-------------------------|-----------------------|
| Adjusted R <sup>2</sup> | 0.864                 |
| # of Data Points        | 15,845                |
| F-value                 | 50,487.5              |
| Prob>F                  | <0.0001               |
| Root MSE                | 1.64x10 <sup>-3</sup> |

## Parameter Statistics

|                 |            |                       |           |         |
|-----------------|------------|-----------------------|-----------|---------|
| Intercept       | Std. Error | 3.6x10 <sup>-3</sup>  |           |         |
|                 | t-value    | 9.99                  | Prob >  t | <0.0001 |
| $P_{LM 6000}$   | Std. Error | 1.58x10 <sup>-4</sup> |           |         |
|                 | t-value    | 8.03                  | Prob >  t | <0.0001 |
| $P_{LM 6000}^2$ | Std. Error | 1.72x10 <sup>-6</sup> |           |         |
|                 | t-value    | 5.39                  | Prob >  t | <0.0001 |

**Region 4**

Equation 
$$\frac{dM_{CO_2, LM 6000}}{dt} = 2.72 \times 10^{-2} + 1.88 \times 10^{-3} P_{LM 6000} - 9.207 \times 10^{-6} \dot{P}_{LM 6000} \quad [tonnes / min]$$

## Regression Statistics

|                         |                       |
|-------------------------|-----------------------|
| Adjusted R <sup>2</sup> | 0.998                 |
| # of Data Points        | 447                   |
| F-value                 | 88,330.9              |
| Prob>F                  | <0.0001               |
| Root MSE                | 1.62x10 <sup>-3</sup> |

## Parameter Statistics

|                 |            |                       |           |         |
|-----------------|------------|-----------------------|-----------|---------|
| Intercept       | Std. Error | 2.72x10 <sup>-2</sup> |           |         |
|                 | t-value    | 122.72                | Prob >  t | <0.0001 |
| $P_{LM 6000}$   | Std. Error | 4.48x10 <sup>-6</sup> |           |         |
|                 | t-value    | 420.07                | Prob >  t | <0.0001 |
| $P_{LM 6000}^2$ | Std. Error | 1.66x10 <sup>-5</sup> |           |         |
|                 | t-value    | -5.52                 | Prob >  t | <0.0001 |

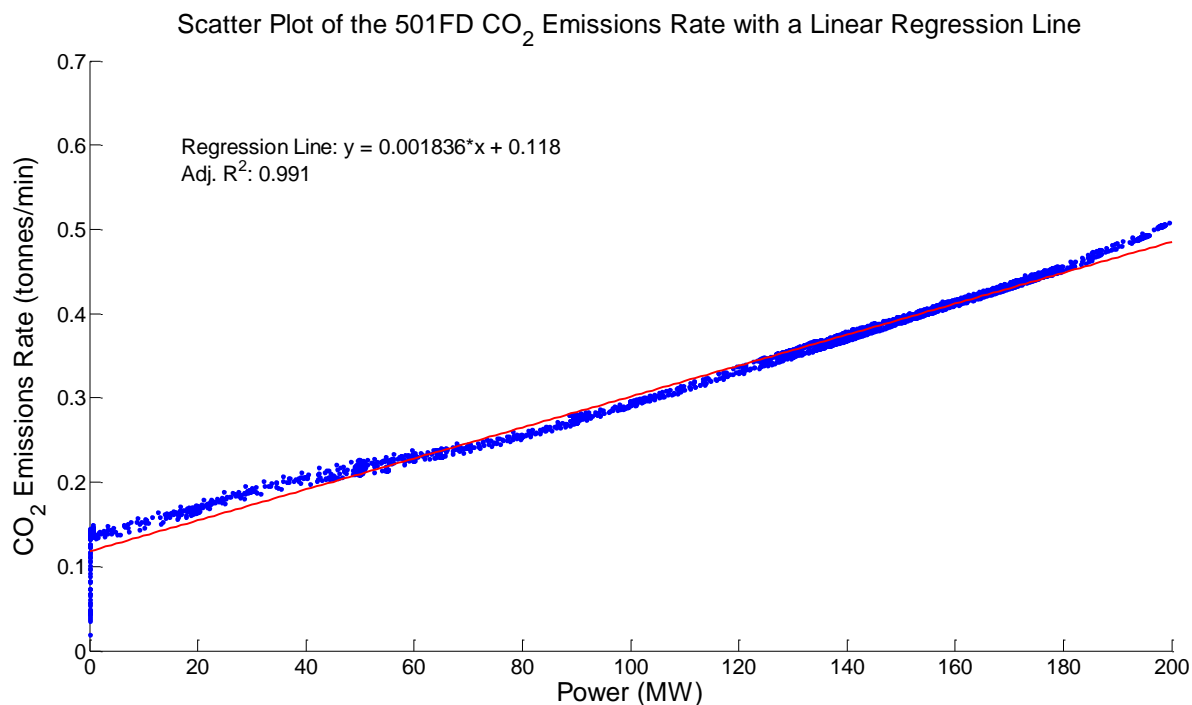

**Figure S6 - CO<sub>2</sub> emissions rate for the 501FD turbines as a function of turbine output power (blue dots) and the linear regression model used to characterize the CO<sub>2</sub> emissions rate (red line). The linear regression equation is  $y = 0.00184x + 0.118$  and has an adjusted  $R^2$  value of 0.991.**

**Table S3 - 501FD Region CO<sub>2</sub> Regression Analysis Results**

---

**Region 1**

Equation  $\frac{dM_{CO_2, 501FD}}{dt} = 1.18 \times 10^{-1} + 1.84 \times 10^{-3} P_{LM6000} \quad [tonnes / min]$

**Regression Statistics**

|                         |                       |
|-------------------------|-----------------------|
| Adjusted R <sup>2</sup> | 0.991                 |
| # of Data Points        | 6,501                 |
| F-value                 | 711,368               |
| Prob>F                  | <0.0001               |
| Root MSE                | $7.29 \times 10^{-3}$ |

**Parameter Statistics**

|             |            |                       |           |         |
|-------------|------------|-----------------------|-----------|---------|
| Intercept   | Std. Error | $2.88 \times 10^{-4}$ |           |         |
|             | t-value    | 416.07                | Prob >  t | <0.0001 |
| $P_{501FD}$ | Std. Error | $2.16 \times 10^{-6}$ |           |         |
|             | t-value    | 843.43                | Prob >  t | <0.0001 |

---

### *NO<sub>x</sub> Approach*

Available NO<sub>x</sub> combustion control technologies are water (liquid or steam) injection systems and dry low-NO<sub>x</sub> combustion designs [1]. The LM6000 data were obtained from 45 MW turbines that injected steam into the combustion chambers, lowering flame temperatures to reduce NO<sub>x</sub>. The 200 MW 501FD turbines used General Electric's Dry-Low NO<sub>x</sub> (DLN) system of lean premixed combustion. The median nameplate size for all US natural gas turbines using Dry Low NO<sub>x</sub> control is 170 MW; using steam injection it is 80 MW. Thus, the turbines for which we have data are moderately representative.

In GE's Dry-Low NO<sub>x</sub> systems, fuel is premixed with air to create a fuel-lean mixture that is burned in a two-stage process to reduce flame temperatures and residence times. At full generator output, GE's DLN operates at a mixture just richer than the flame blowout point of natural gas. As the generator load is reduced, less fuel is fed to the combustion chamber resulting in lower flame temperatures. As load is reduced further the flame blowout point is reached and GE's DLN system can no longer employ the fuel-lean premixed firing mode, and shifts to a diffusion flame where high flame temperatures are present. As a result, low NO<sub>x</sub> emission rates are achieved in the power range of approximately 50% to 100% of nameplate capacity and NO<sub>x</sub> emission rates an order of magnitude greater are observed in the power range of 0% to 50% [2].

Taking the same approach used to model CO<sub>2</sub> emissions, we modeled NO<sub>x</sub> emission rates as a function of power level and ramp rate (equations S6 – S9). For region 3, no satisfactory result could be derived and the mean of the data was used (standard deviation of 0.022). Figures S8 and S9 display the goodness of fit for each regression.

The 501FD NO<sub>x</sub> data were divided into three regions: low power, medium power, and full power (labeled regions 1, 2, and 3, respectively). Equations S10 – S12 are the regression results for the 501FD data and figure S7 compares the regression results with the 501FD NO<sub>x</sub>



emission data. Adjusted  $R^2$  values can be found in Table S1 and detailed statistical information can be found in Tables S4 and S5.

*LM6000 NO<sub>x</sub> Regression Results (in kg / min)*

$$\text{Region 1} \quad \frac{dM_{NOx, LM 6000}}{dt} = 1.31 \times 10^{-1} + 6.62 \times 10^{-2} P_{LM 6000} - 3.89 \times 10^{-3} \dot{P}_{LM 6000} \quad (S6)$$

$$\text{Region 2} \quad \frac{dM_{NOx, LM 6000}}{dt} = 6.76 \times 10^{-1} - 2.27 \times 10^{-2} P_{LM 6000} + 3.27 \times 10^{-4} P_{LM 6000}^2 - 1.3 \times 10^{-2} \dot{P}_{LM 6000} + 6.53 \times 10^{-4} \dot{P}_{LM 6000}^2 \quad (S7)$$

$$\text{Region 3} \quad \frac{dM_{NOx, LM 6000}}{dt} = 2.68 \times 10^{-1} \quad (S8)$$

$$\text{Region 4} \quad \frac{dM_{NOx, LM 6000}}{dt} = 8.35 \times 10^{-2} + 7.53 \times 10^{-4} P_{LM 6000} - 3.85 \times 10^{-3} P_{LM 6000}^2 \quad (S9)$$

*501FD NO<sub>x</sub> Regression Results (in kg / min)*

$$\text{Region 1} \quad \frac{dM_{NOx, 501FD}}{dt} = 8.03 \times 10^{-1} + 2.45 \times 10^{-2} P_{501FD} - 3.49 \times 10^{-4} P_{501FD}^2 \quad (S10)$$

$$\text{Region 2} \quad \frac{dM_{NOx, 501FD}}{dt} = -9.48 \times 10^{-1} + 6.12 \times 10^{-2} P_{501FD} - 3.95 \times 10^{-4} P_{501FD}^2 \quad (S11)$$

$$\text{Region 3} \quad \frac{dM_{NOx, 501FD}}{dt} = 1.18 \times 10^{-1} - 5.76 \times 10^{-4} P_{501FD} + 4.1 \times 10^{-6} P_{501FD}^2 \quad (S12)$$

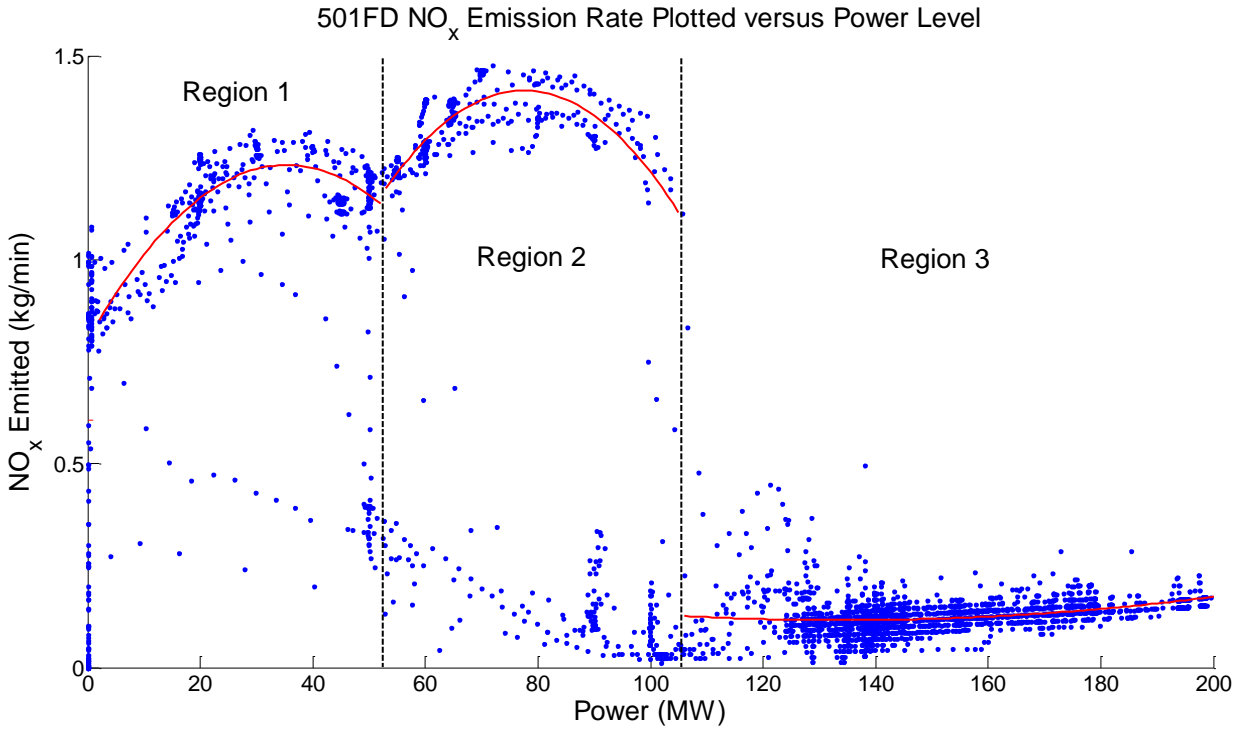

**Figure S7 - 501FD NO<sub>x</sub> emissions data as a function of power (blue dots) and regression (red line). The emissions data were divided into three regions which were modeled independently of each other. This combined-cycle turbine is designed to produce low NO<sub>x</sub> only when operated at high power.**

**Table S4 - 501FD Region NO<sub>x</sub> Regression Results****Region 1**

Equation 
$$\frac{dM_{NOx,501FD}}{dt} = 8.03 \times 10^{-1} + 2.45 \times 10^{-2} P_{501FD} - 3.49 \times 10^{-4} P_{501FD}^2 \quad [kg / min]$$

## Regression Statistics

|                         |                       |
|-------------------------|-----------------------|
| Adjusted R <sup>2</sup> | 0.72                  |
| # of Data Points        | 463                   |
| F-value                 | 723.12                |
| Prob>F                  | <0.0001               |
| Root MSE                | 6.99x10 <sup>-2</sup> |

## Parameter Statistics

|               |            |                       |           |         |
|---------------|------------|-----------------------|-----------|---------|
| Intercept     | Std. Error | 6.99x10 <sup>-3</sup> |           |         |
|               | t-value    | 124.45                | Prob >  t | <0.0001 |
| $P_{501FD}$   | Std. Error | 6.44x10 <sup>-4</sup> |           |         |
|               | t-value    | 30.03                 | Prob >  t | <0.0001 |
| $P_{501FD}^2$ | Std. Error | 1.18x10 <sup>-5</sup> |           |         |
|               | t-value    | -23.13                | Prob >  t | <0.0001 |

**Region 2**

Equation 
$$\frac{dM_{NOx,501FD}}{dt} = -9.48 \times 10^{-1} + 6.12 \times 10^{-2} P_{501FD} - 3.95 \times 10^{-4} P_{501FD}^2 \quad [kg / min]$$

## Regression Statistics

|                         |                       |
|-------------------------|-----------------------|
| Adjusted R <sup>2</sup> | 0.64                  |
| # of Data Points        | 562                   |
| F-value                 | 489                   |
| Prob>F                  | <0.0001               |
| Root MSE                | 4.58x10 <sup>-2</sup> |

## Parameter Statistics

|               |            |                       |           |         |
|---------------|------------|-----------------------|-----------|---------|
| Intercept     | Std. Error | 7.26x10 <sup>-2</sup> |           |         |
|               | t-value    | -12.98                | Prob >  t | <0.0001 |
| $P_{501FD}$   | Std. Error | 2.0x10 <sup>-3</sup>  |           |         |
|               | t-value    | 30.47                 | Prob >  t | <0.0001 |
| $P_{501FD}^2$ | Std. Error | 1.33x10 <sup>-5</sup> |           |         |
|               | t-value    | -29.49                | Prob >  t | <0.0001 |

**Region 3**

Equation 
$$\frac{dM_{NOx,501FD}}{dt} = 1.18 \times 10^{-1} - 5.76 \times 10^{-4} P_{501FD} + 4.1 \times 10^{-6} P_{501FD}^2 \quad [kg / min]$$

## Regression Statistics

|                         |                       |
|-------------------------|-----------------------|
| Adjusted R <sup>2</sup> | 0.28                  |
| # of Data Points        | 5,129                 |
| F-value                 | 979.37                |
| Prob>F                  | <0.0001               |
| Root MSE                | 1.02x10 <sup>-2</sup> |

## Parameter Statistics

|               |            |                       |           |         |
|---------------|------------|-----------------------|-----------|---------|
| Intercept     | Std. Error | 1.96x10 <sup>-2</sup> |           |         |
|               | t-value    | 6.10                  | Prob >  t | <0.0001 |
| $P_{501FD}$   | Std. Error | 2.52x10 <sup>-4</sup> |           |         |
|               | t-value    | -2.39                 | Prob >  t | <0.0001 |
| $P_{501FD}^2$ | Std. Error | 7.98x10 <sup>-7</sup> |           |         |
|               | t-value    | 5.24                  | Prob >  t | 0.0002  |

### LM6000 Regression Analysis

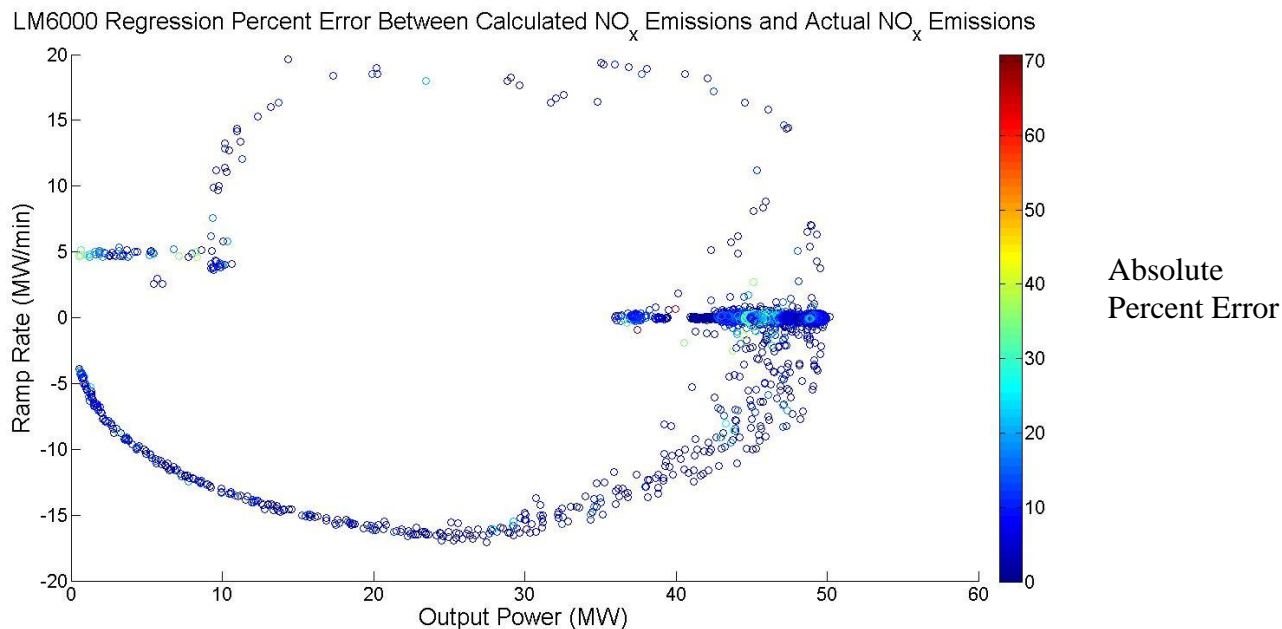

**Figure S8 - Absolute percent error between calculated NO<sub>x</sub> emissions based on regressions and actual NO<sub>x</sub> emissions from LM6000 data set.**

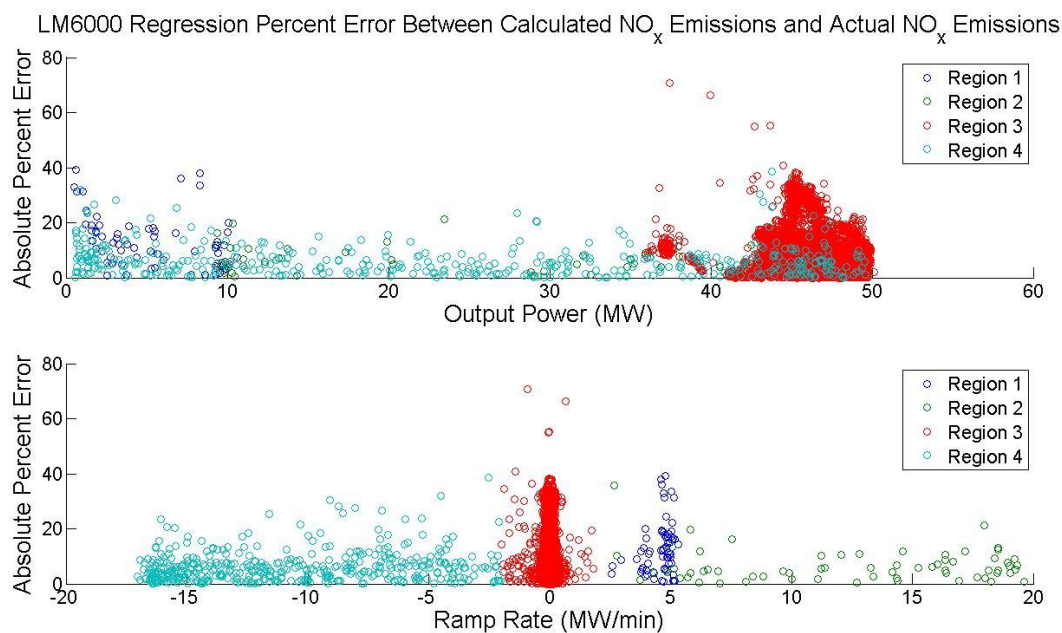

**Figure S9 - Absolute percent error between calculated NO<sub>x</sub> emissions based on regressions and actual NO<sub>x</sub> emissions from LM6000 data set. Results are colored according to the regions (fig. S3). Top: absolute percent error for each data point versus power level. Bottom: absolute percent error for each data point versus ramp rate.**

Table S5 - LM6000 Region NO<sub>x</sub> Regression Results

Region 1

Equation

$$\frac{dM_{NOx, LM\ 6000}}{dt} = 1.31x10^{-1} + 6.62x10^{-2} P_{LM\ 6000} - 3.89x10^{-3} \dot{P}_{LM\ 6000} \quad [kg / min]$$

Regression Statistics

Adjusted R<sup>2</sup>

0.85

# of Data Points

134

F-value

159.56

Prob>F

<0.0001

Root MSE

5.26x10<sup>-2</sup>

Parameter Statistics

Intercept

Std. Error

6.99x10<sup>-3</sup>

t-value

13.64

Prob > |t|

<0.0001

P<sub>LM 6000</sub>

Std. Error

1.6x10<sup>-3</sup>

t-value

11.77

Prob > |t|

<0.0001

R<sub>LM 6000</sub>

Std. Error

2.48x10<sup>-3</sup>

t-value

13.18

Prob > |t|

<0.0001

Region 2

Equation

$$\frac{dM_{NOx, LM\ 6000}}{dt} = 6.76x10^{-1} - 2.27x10^{-2} P_{LM\ 6000} + 3.27x10^{-4} P_{LM\ 6000}^2 - 1.3x10^{-2} \dot{P}_{LM\ 6000} + 6.53x10^{-4} \dot{P}_{LM\ 6000}^2 \quad [kg / min]$$

Regression Statistics

Adjusted R<sup>2</sup>

0.84

# of Data Points

65

F-value

83.56

Prob>F

<0.0001

Root MSE

2.95x10<sup>-2</sup>

Parameter Statistics

Intercept

Std. Error

3.96x10<sup>-2</sup>

t-value

17.13

Prob > |t|

<0.0001

P<sub>LM 6000</sub>

Std. Error

2.74x10-3

t-value

-8.27

Prob > |t|

<0.0001

P<sub>LM 6000</sub><sup>2</sup>

Std. Error

4.81x10<sup>-5</sup>

t-value

6.83

Prob > |t|

<0.0001

R<sub>LM 6000</sub>

Std. Error

4.85x10<sup>-3</sup>

t-value

-2.69

Prob > |t|

0.0094

R<sub>LM 6000</sub><sup>2</sup>

Std. Error

2.18x10<sup>-4</sup>

t-value

2.99

Prob > |t|

0.004

Region 3

Equation

$$\frac{dM_{NOx, LM\ 6000}}{dt} = 2.68x10^{-1} \quad [kg / min]$$

Mean Statistics

Standard Deviation

0.0222

# of Data Points

15,844

Region 4

Equation

$$\frac{dM_{NOx, LM\ 6000}}{dt} = 8.35x10^{-2} + 7.53x10^{-4} P_{LM\ 6000} - 3.85x10^{-3} P_{LM\ 6000}^2 \quad [kg / min]$$

Regression Statistics

Adjusted R<sup>2</sup>

0.94

# of Data Points

447

F-value

3,486

Prob>F

<0.0001

Root MSE

1.67x10<sup>-2</sup>

Parameter Statistics

Intercept

Std. Error

1.72x10<sup>-3</sup>

t-value

50.2

Prob > |t|

<0.0001

P<sub>LM 6000</sub>

Std. Error

1.91e-4

t-value

23.7

Prob > |t|

<0.0001

P<sub>LM 6000</sub><sup>2</sup>

Std. Error

3.89e-6

t-value

-3.71

Prob > |t|

0.0002

## **2. Regressions Constraints**

### *LM6000 Regression Constraints*

The LM6000 turbines were generally operated in a consistent manner (figs. S1-S3): initialized, ramped up quickly and held at or near full power, and ramped quickly down, and turned off. Thus, not all the power-ramp-rate control space is sampled in the data we obtained. We applied constraints to our LM6000 model to ensure the model turbine was operated in regions sampled by the actual data (green lines in fig. S3).

Compensating for wind or solar power fluctuations in the simulations required some power and ramp rate combinations not situated on a constraint curve; we created an ensemble of samples from points on the constraint curves to match the desired combinations. We found that in doing so, the maximum error in the base load plant's output was 7.6% and the mean error was 1.6%. It is possible that our approach produces inaccurate results due to the incompletely sampled power-ramp-rate control space.

### 501FD Regression Constraints

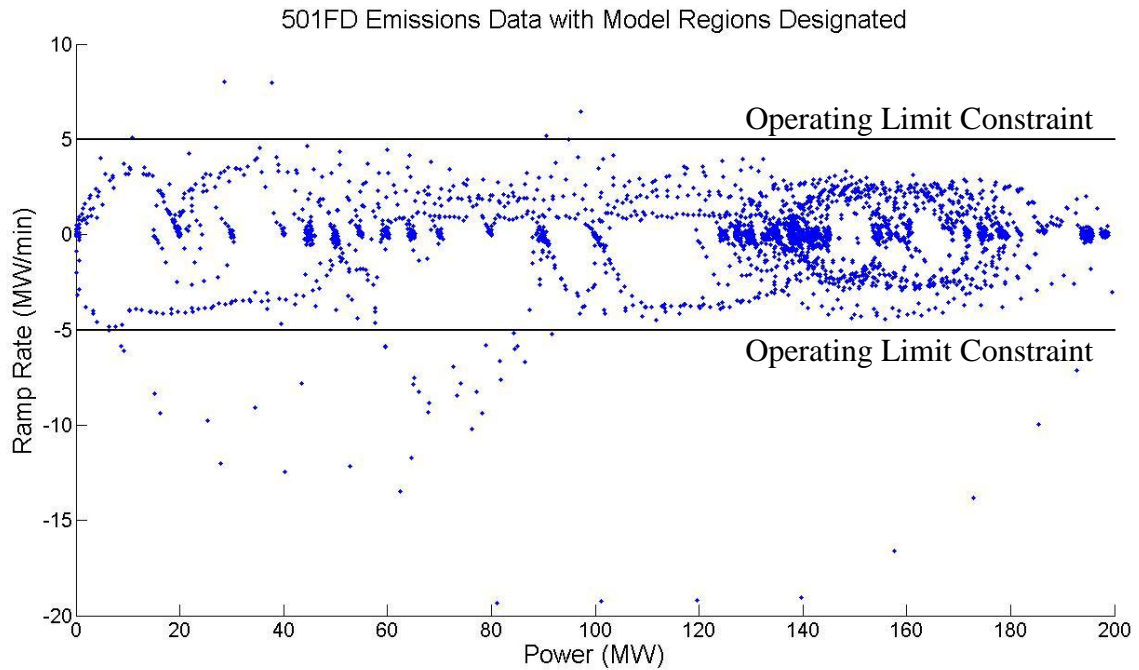

**Figure S10 - 501FD emissions data.** The boundaries on the model's ramp rate, imposed by the populated data points in the control map, are shown. The 501FD was operated in a manner that sampled more points in its control map than the LM6000 and as a result the 501FD model is not as constrained as the LM6000 model.

The 501FD was cycled through its control space in a manner that sampled more points (fig. S10) than the LM6000 turbines. As a result, the 501FD model is not as strictly constrained as the LM6000 model. The only constraints imposed on the 501FD model were limitations on the maximum and minimum ramp rates, set at 5 MW/min and -5 MW/min, respectively.

## 3. Profile Sensitivity Analysis Raw Data

The results of the model are dependent upon how much the gas turbine(s) ramp through their power range and at what power levels they are required to operate. Therefore, the results seen in Table 1 of the main paper, obtained from using the full time series of the 5 data sets (see Table S6), estimates only the emission reductions for the conditions that existed during the periods when the data were collected. Ideally, a significant number of high time-resolution independent

power plant outputs would be used in our simulations. However we did not have access to such a data set, only to the 5 data sets described.

**TABLE S6. Wind and solar photovoltaic data sets from utility-scale sites used in the analysis. The maximum observed power of several of the power plants exceeded their nameplate capacity; in other cases the nameplate capacity was not reached during the period for which data were obtained.**

| <b>Data set</b>       | <b>Power plant type</b> | <b>Capacity factor based on nameplate wind or PV size</b> | <b>Normalized capacity factor based on maximum observed power</b> | <b>Resolution</b> | <b>Data set length</b> |
|-----------------------|-------------------------|-----------------------------------------------------------|-------------------------------------------------------------------|-------------------|------------------------|
| Eastern               | Wind                    | 0.07                                                      | 0.12                                                              | 1 second          | 240 hours              |
| Northern Great Plains | Wind                    | 0.57                                                      | 0.59                                                              | 10 second         | 15 hours               |
| Central Great Plains  | Wind                    | 0.53                                                      | 0.54                                                              | 10 second         | 84 hours               |
| Southern Great Plains | Wind                    | 0.50                                                      | 0.46                                                              | 10 second         | 370 hours              |
| Southwest             | Solar PV                | 0.19                                                      | 0.19                                                              | 1 minute          | 732 days               |

For wind data, one could imagine generating theoretical wind data, subject to certain constraints, such as ensuring the appropriate frequency and phase characteristics [3, 4]. Instead, we relied on the actual high time resolution data, creating smaller data subsets from the initial data thereby creating a large collection of data sets that represent a variety of variable power plant outputs. To create the smaller data sets, a sliding window 1,000 minutes in length was used to produce smaller data samples 1,000 minutes long. The Eastern wind plant data, recorded over a 10 day period, is 14,400 minutes in length and using the sliding window produced 13,401 data subsets. Each data subset differs from the preceding data subset by two data points. Therefore, there is a significant amount of correlation between the smaller data sets and it is this correlation that produces the lines, or tracks, seen in Figures S11 through S14.



For the solar PV data, each day that power was produced was used as a data subset. The solar data obtained was 732 days in length and thus produced 732 data subsets used in the profile sensitivity analysis.

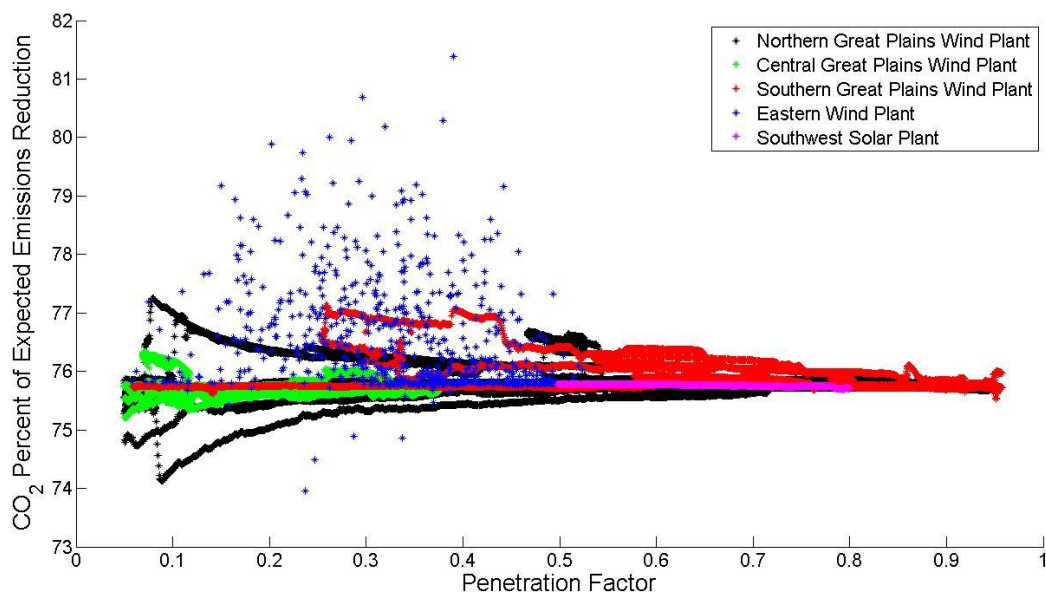

**Figure S11 - 501FD CO<sub>2</sub> expected emissions reduction raw results from profile sensitivity analysis.**

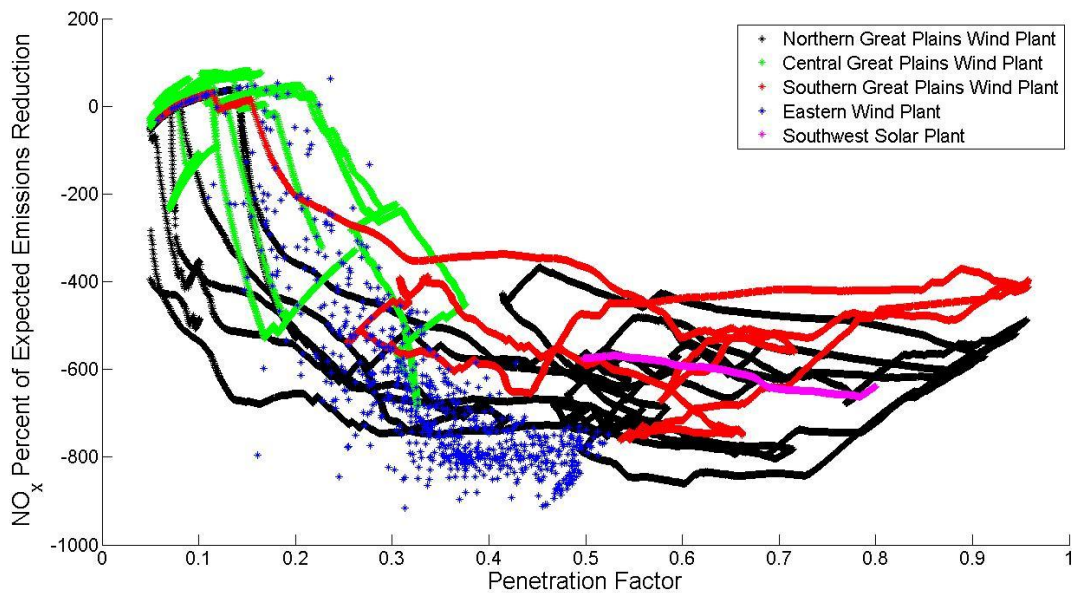

**Figure S12 - 501FD NO<sub>x</sub> expected emissions reduction raw results from profile penetration analysis.**

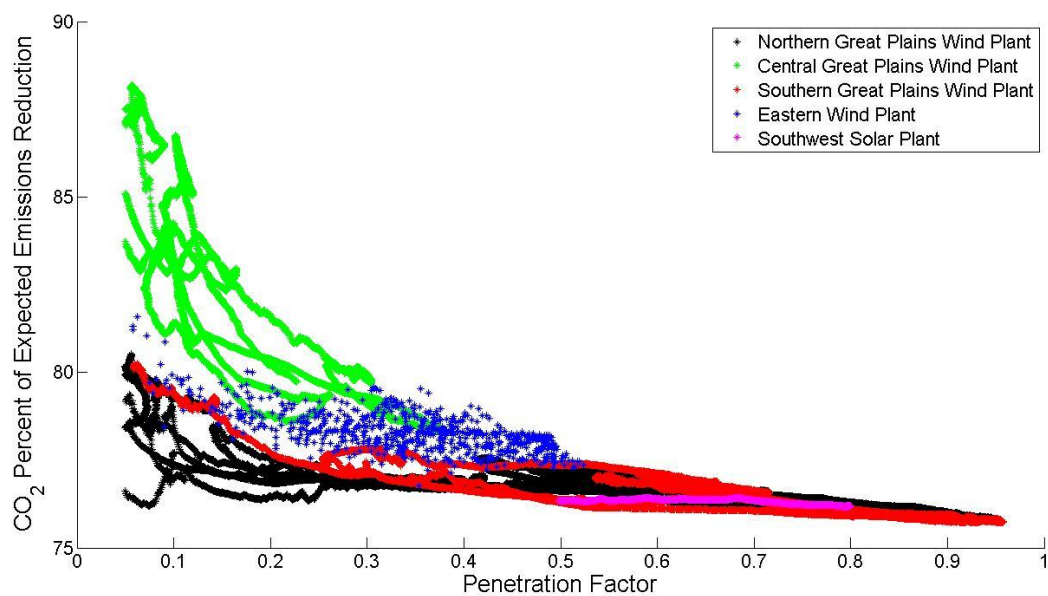

Figure S13 - LM6000 CO<sub>2</sub> expected emissions reduction raw results from profile penetration analysis.

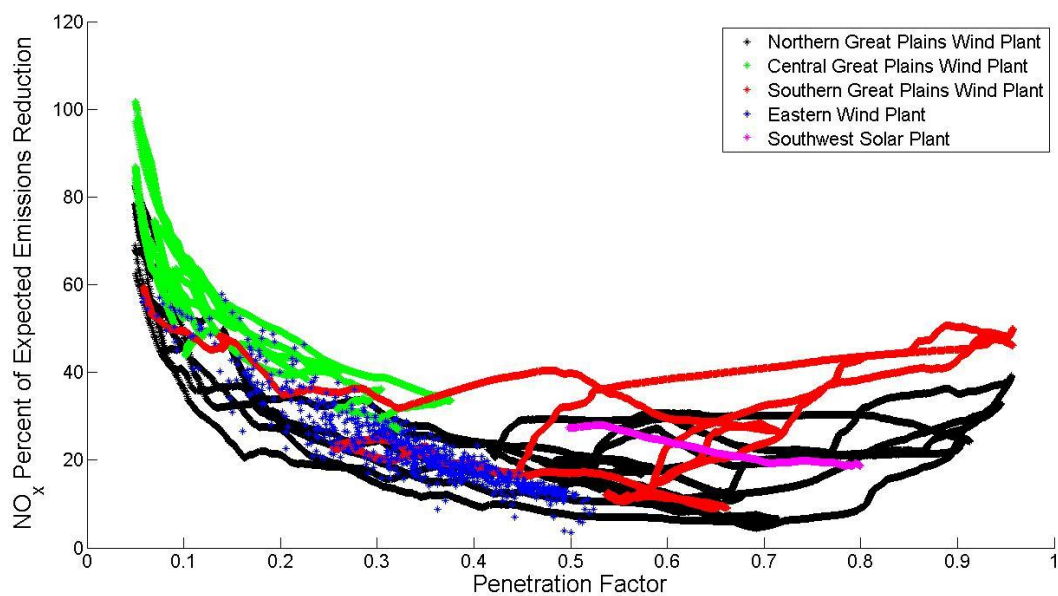

Figure S14 - LM6000 NO<sub>x</sub> expected emissions reduction raw results from profile penetration analysis.

## 4. Multiple Turbine Analysis

In order to investigate how emissions are affected by the penetration factor of wind, the constraint of pairing the wind farm with only one natural-gas turbine is relaxed. One to five natural-gas turbines were paired with the wind farm to produce a base load variable plant of size  $n \cdot P$  MW, where  $n$  is the number of turbines and  $P$  is the power limit of the turbine. The fill-in power required is divided equally among the turbines and as a result the lower power limit of the turbines is  $P - P/n$  MW.

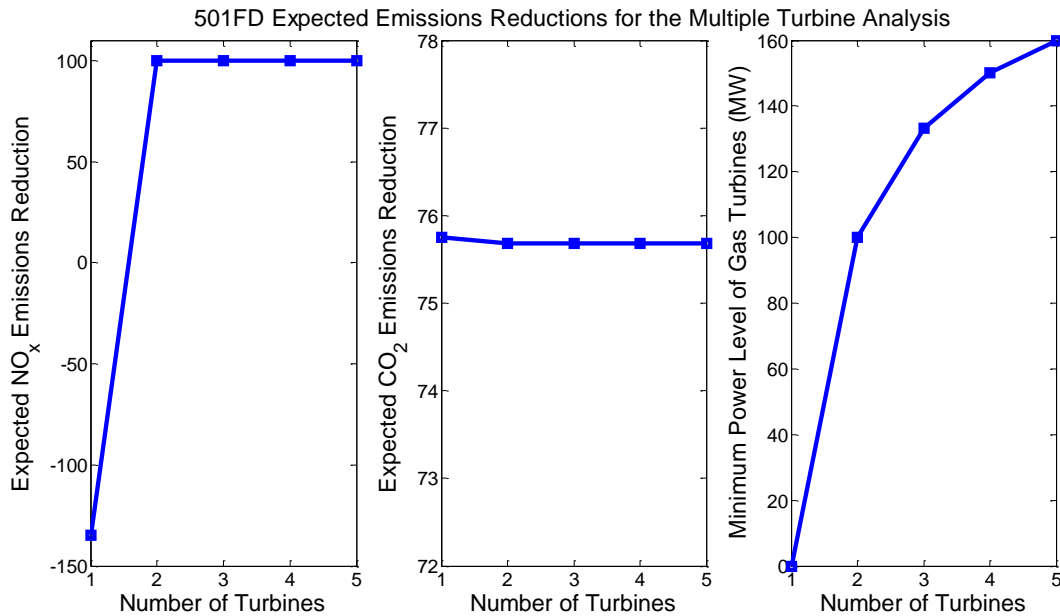

**Figure S15 - 501FD multiple turbine analysis using the Eastern wind data set. By pairing  $n$  501FD turbines with a variable power plant, the lower power limit ( $P_{\min}$ ) of the turbines is  $P - P/n$  MW. For 2 or more turbines,  $P_{\min}$  is greater than 50% of the 501FD's nameplate capacity and NO<sub>x</sub> emissions are reduced according to expectations. If no attention is paid to  $P_{\min}$ , NO<sub>x</sub> emissions increase.**

Figure S15 shows the results of the multiple turbine analysis for 501FD turbines using the Eastern wind data set. Limiting the minimum operating power level of the natural-gas turbine in the variable base load plant produces significantly better NO<sub>x</sub> emissions performance. By limiting a 501FD to power regions of 50% of nameplate capacity or greater, the poor emissions

performance region of GE's DLN system, where NO<sub>x</sub> emissions are an order of magnitude higher, is avoided and emissions are displaced at effectively a linear rate and match expectations. Limiting the minimum power level has no effect upon the CO<sub>2</sub> emissions performance when using 501FDs.

## **5. Literature Cited**

- [1] U.S. Environmental Protection Agency. *Alternative Control Techniques Document – NO<sub>x</sub> Emissions from Stationary Gas Turbines*; EPA-453/R-93-007; Emission Standards Division: Washington, DC, 1993. <http://www.epa.gov/ttn/catc/dir1/gasturb.pdf>
- [2] Davis, L.B.; Black, S.H. Dry Low NO<sub>x</sub> Combustion Systems for GE Heavy-Duty Gas Turbines; GER-3568G; General Electric Power Systems: Schenectady, NY, 2000. [http://www.gepower.com/prod\\_serv/products/tech\\_docs/en/downloads/ger3568g.pdf](http://www.gepower.com/prod_serv/products/tech_docs/en/downloads/ger3568g.pdf)
- [3] Apt, J. The Spectrum of Power from Wind Turbines. *J. of Power Sources*. **2007**, 169 (2), 369-374.
- [4] Curtright, A.; Apt, J. The Character of Power Output from Utility-Scale Photovoltaic Systems. *Progress in Photovoltaics*. **2008**. 16 (3), 241-247.
